# Supplementary material for: Active Stat3 is required for survival of human squamous cell carcinoma cells in serum-free conditions
Source: Springer Nature journal article supplement (doi:10.1186/1476-4598-5-15), 2006-04-07

A

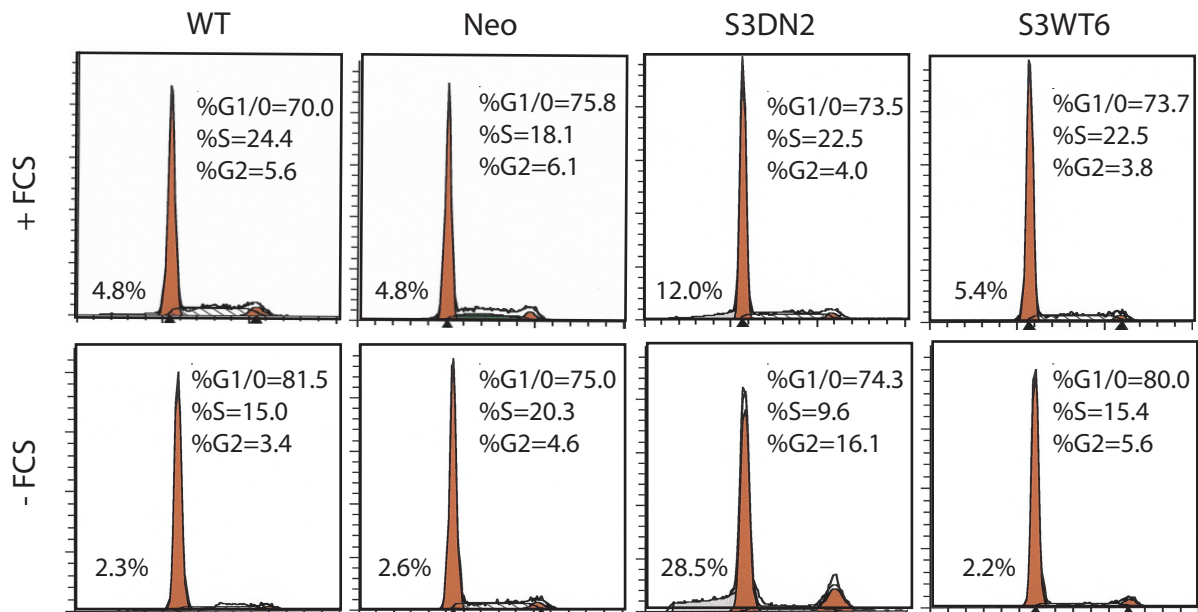

B

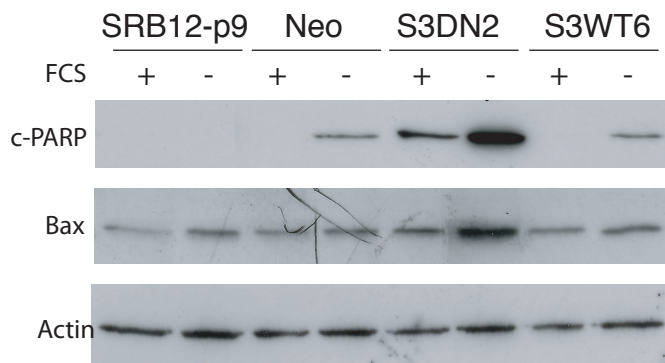

Supplement: 12943_2005_147_MOESM4_ESM.pdf [file 12943_2005_147_MOESM4_ESM.pdf]
